# Supplementary material for: Efficiency and power in genetic association studies
Source: Springer Nature journal article supplement (doi:10.1038/ng1669), 2005-10-23

Supplementary Figure 2 - Absolute power to detect association for all common causal SNPs as a function of the number of proxies in the complete data.

Results are for pairwise ( $r^2 \geq 0.8$ ) tags picked from pseudo HapMap in ENCODE region ENr113 in CEU.

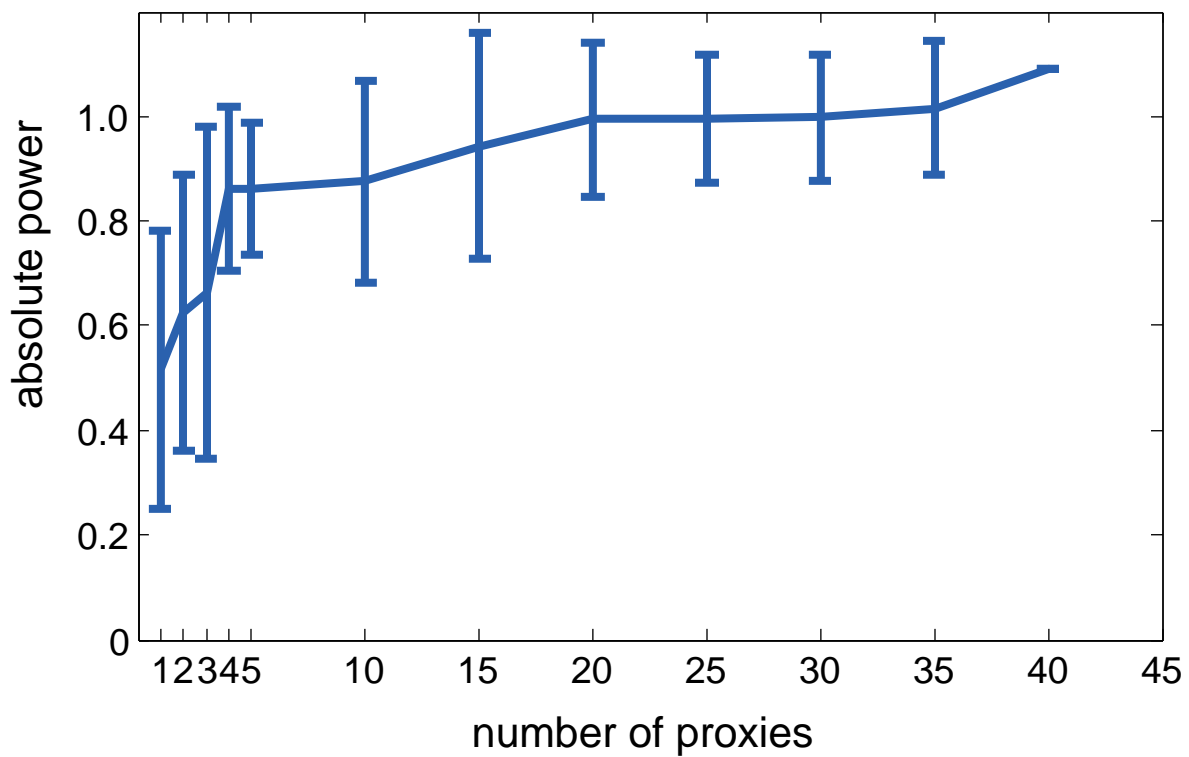

Supplement: ng1669-S2.pdf [file ng1669-S2.pdf]
